# Supplementary material for: Biomass- and Carbon Dioxide-Derived Polyurethane Networks for Thermal Interface Material Applications
Source: MDPI journal article supplement (doi:10.3390/polym16020177), 2024-01-07
Supplement: s1 [file s1]

## Supplementary Materials

# Sustainable Network Polyurethanes Using Carbon Dioxide and Biomass-Derived Alcohols as Thermal Interface Materials

Ji Won Jang<sup>1†</sup>, Inwhan Cha<sup>1†</sup>, Junhyeon Choi<sup>2†</sup>, Jungwoo Han<sup>1</sup>, Joon Young Hwang<sup>2</sup>, Seung Uk Son<sup>1</sup>, Eun Joo Kang<sup>2\*</sup>, and Changsik Song<sup>1\*</sup>

<sup>1</sup>Department of Chemistry, Sungkyunkwan University, Suwon, 16419, Republic of Korea

<sup>2</sup>Department of Applied Chemistry, Kyung Hee University, Yongin, 17104, Republic of Korea

\*E-mail: songcs@skku.edu ; ejkang24@khu.ac.kr.

## Table of Contents

|   |                                                                                                                                                                                                                |     |
|---|----------------------------------------------------------------------------------------------------------------------------------------------------------------------------------------------------------------|-----|
| ✓ | <b>Table S1</b> The diffusivity, density, specific heat, and thermal conductivity of CPU-Ag composites. ....                                                                                                   | S2  |
| ✓ | <b>Figure S1</b> FT-IR spectra of CPU1~3 and starting materials.....                                                                                                                                           | S3  |
| ✓ | <b>Figure S2</b> DSC and TGA curves of CPU1~3 powder .....                                                                                                                                                     | S4  |
| ✓ | <b>Figure S3.</b> Storage modulus in the strain sweep of CPU1~3 at 180 °C. ....                                                                                                                                | S5  |
| ✓ | <b>Figure S4</b> Comparison of stress relaxation profiles of CPU1, CPU2, and CPU3 at (a) 140 °C, (b) 150 °C, and (c) 160 °C. (d) Arrhenius plot of the measured relaxation times for CPU1, CPU2, and CPU3..... | S6  |
| ✓ | <b>Figure S5.</b> SEM images of CPU1-Ag (a) and CPU2-Ag (b). SEM-EDS mapping of CPU1-Ag (c) and CPU2-Ag (d). ....                                                                                              | S7  |
| ✓ | <b>Figure S6.</b> Stress relaxation analysis at 140 °C, 150 °C, 160 °C of CPU1-Ag (a) and CPU2-Ag (b). ....                                                                                                    | S8  |
| ✓ | <b>Figure S7.</b> Malleability test of CPU1-Ag.....                                                                                                                                                            | S9  |
| ✓ | <b>Figure S8.</b> Comparisons of DSC (a) and TGA curves (b) of CPU1 and CPU1-Ag .....                                                                                                                          | S10 |
| ✓ | <b>Figure S9</b> <sup>1</sup> H and <sup>13</sup> C NMR spectra of FCT-1 .....                                                                                                                                 | S11 |
| ✓ | <b>Figure S10</b> <sup>1</sup> H and <sup>13</sup> C NMR spectra of FCT-2 .....                                                                                                                                | S12 |
| ✓ | <b>Figure S11</b> <sup>1</sup> H and <sup>13</sup> C NMR spectra of FCT-3 .....                                                                                                                                | S13 |

**Table S1.** The diffusivity, density, specific heat, and thermal conductivity of CPU-Ag composites.

| Name           | $\alpha^a$<br>(mm <sup>2</sup> /s) | $\rho^b$<br>(g/cm <sup>3</sup> ) | $C_p^c$<br>(J/g.K) | $\kappa^d$<br>(W/m.K) |
|----------------|------------------------------------|----------------------------------|--------------------|-----------------------|
| <b>CPU1-Ag</b> | 26.522                             | 4.654                            | 0.414              | 51.1                  |
| <b>CPU2-Ag</b> | 10.382                             | 4.216                            | 0.546              | 23.9                  |
| <b>CPU3-Ag</b> | 5.948                              | 4.187                            | 0.534              | 13.3                  |

<sup>a</sup>Thermal diffusivity of composites was measured by LFA (LFA467). <sup>b</sup>Density was measured in 25 °C.

<sup>c</sup>Specific heat capacity was measured by specific heat DSC in 25 °C. <sup>d</sup>Thermal conductivity of composites was calculated by using the equation:  $\kappa = \alpha \times \rho \times C_p$

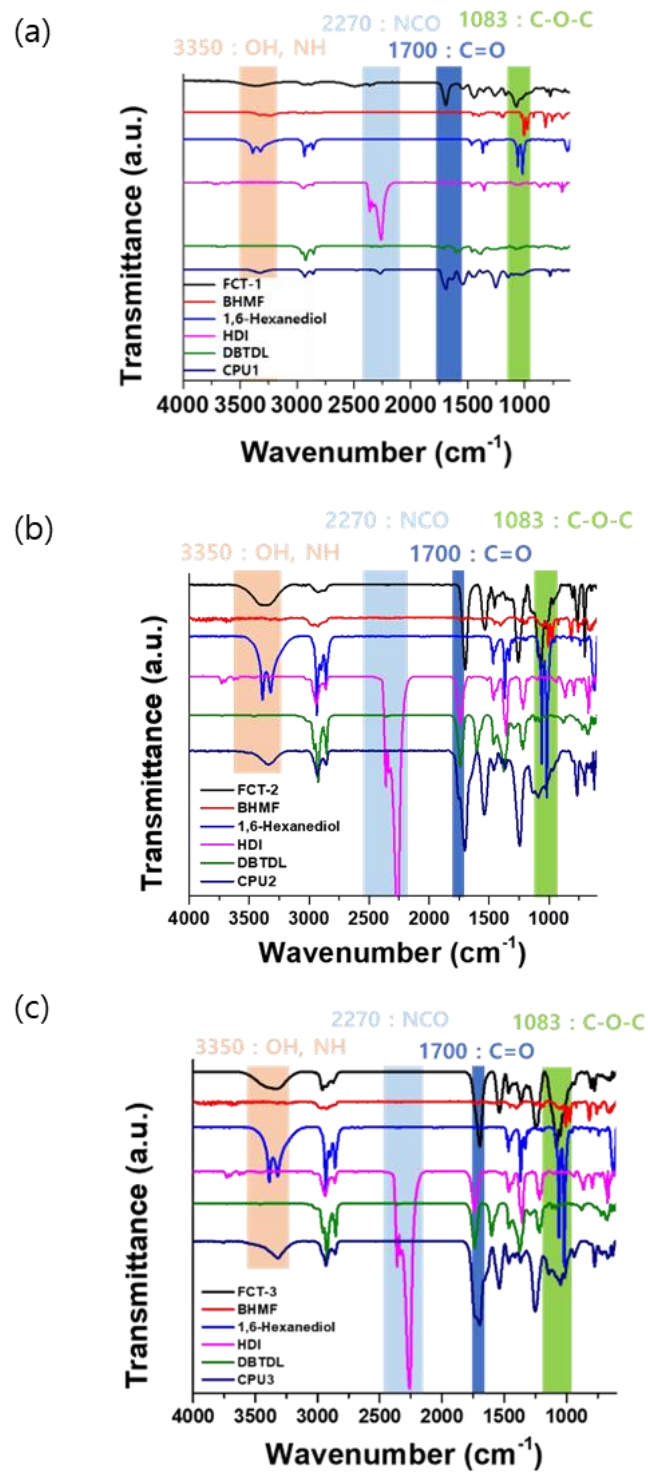

**Figure S1.** (FT-IR spectra of CPU1~3 and starting materials

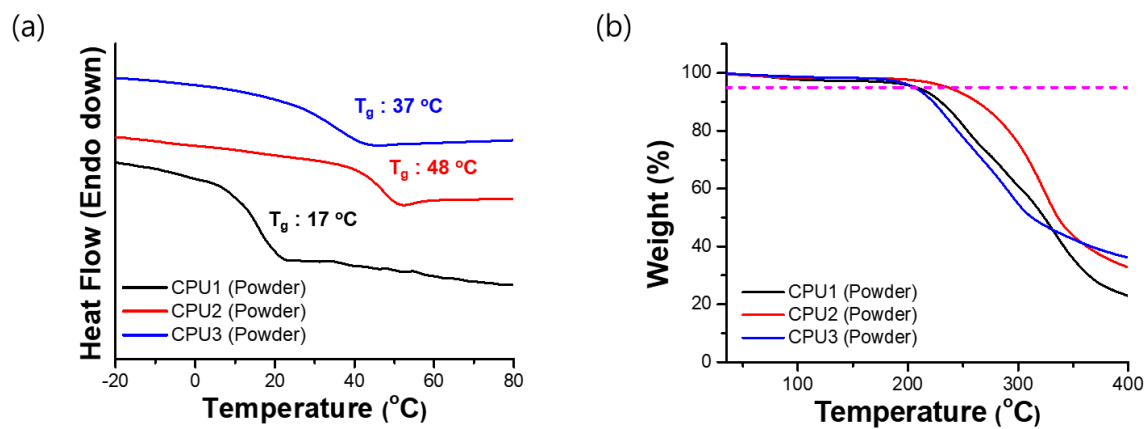

**Figure S2.** DSC and TGA curves of CPU1~3 powder

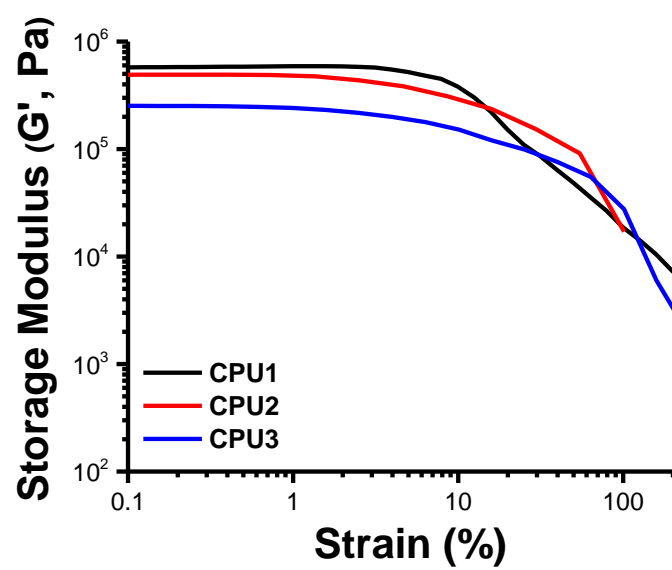

**Figure S3.** Storage modulus in the strain sweep of CPU1~3 at 180 °C.

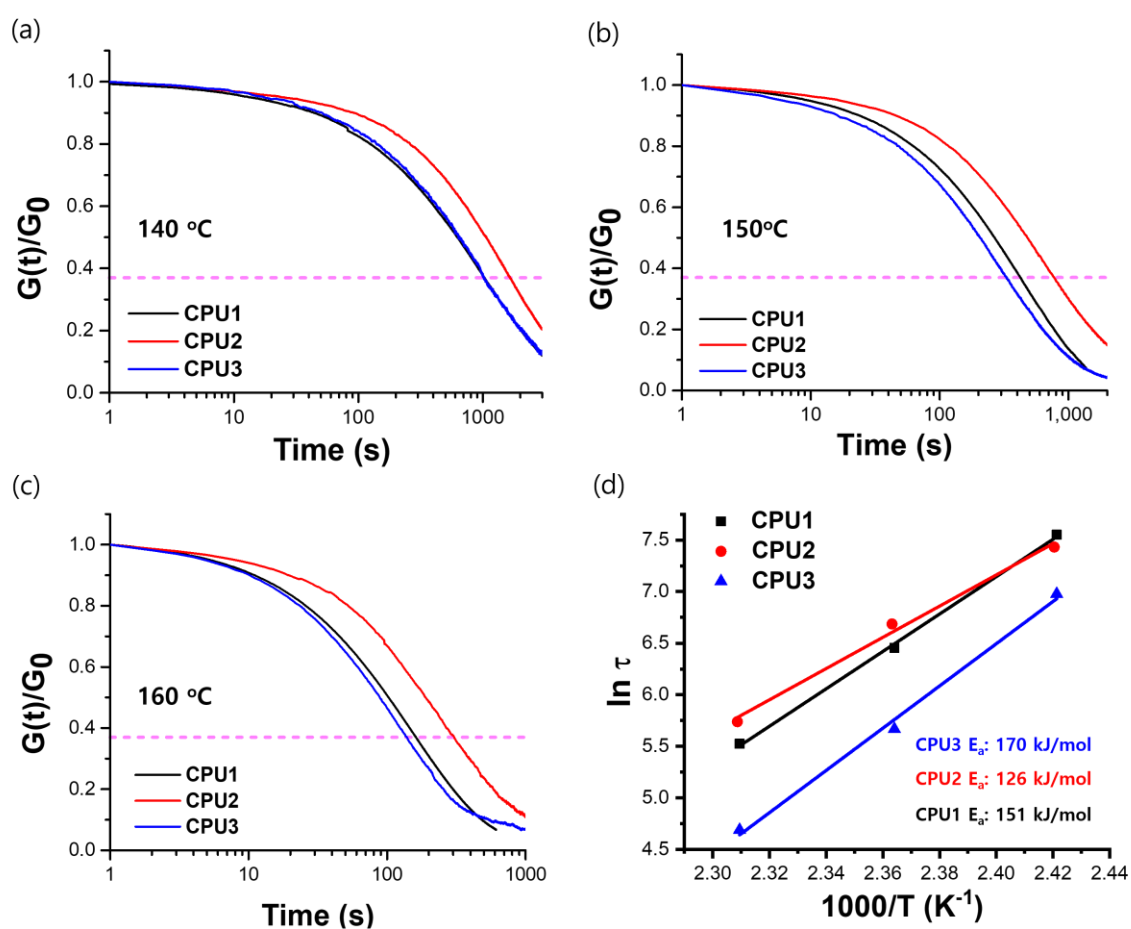

**Figure S4.** Comparison of stress relaxation analysis of CPU1, CPU2, and CPU3 at (a) 140 °C, (b) 150 °C, (c) 160 °C (d) Arrhenius plot of the measured relaxation times for CPU1, CPU2, and CPU3

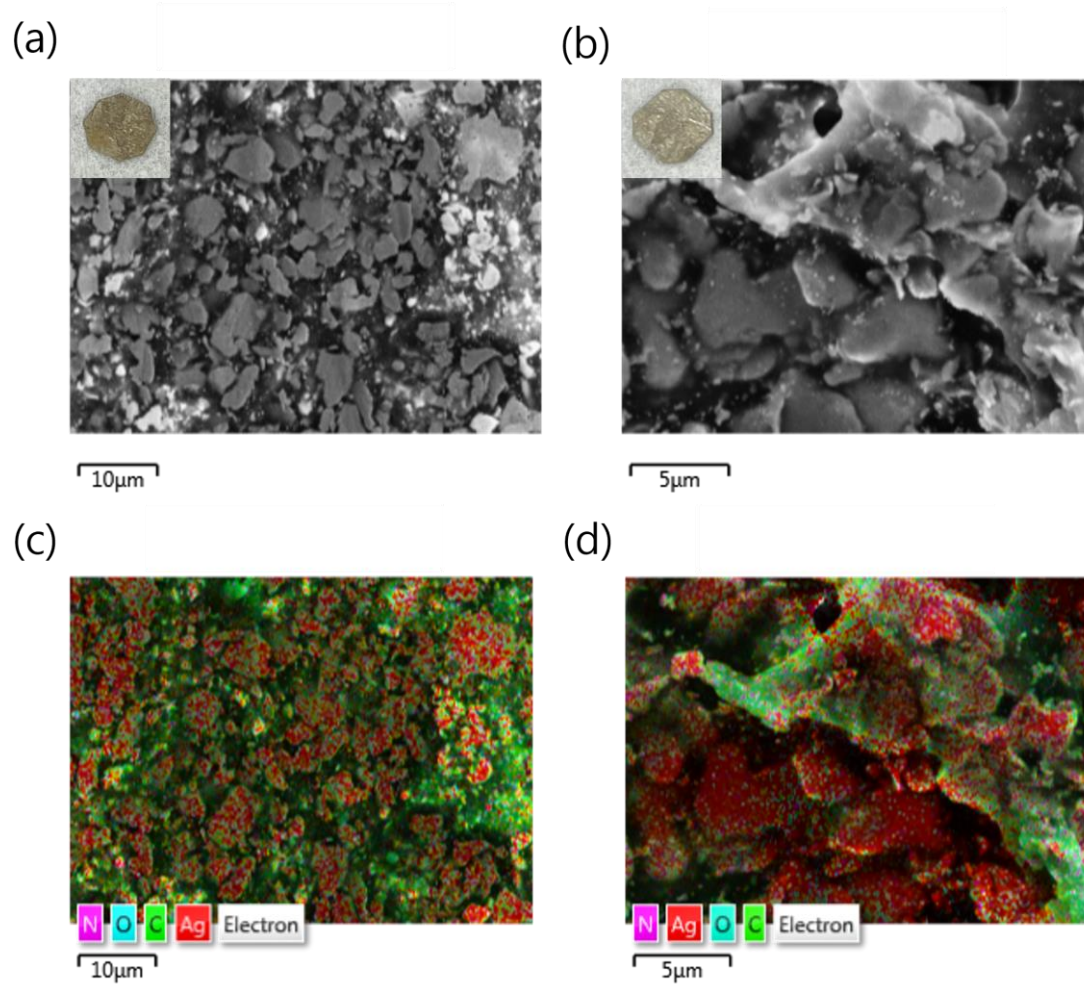

**Figure S5.** SEM images of CPU1-Ag (a) and CPU2-Ag (b). SEM-EDS mapping of CPU1-Ag (c) and CPU2-Ag (d)

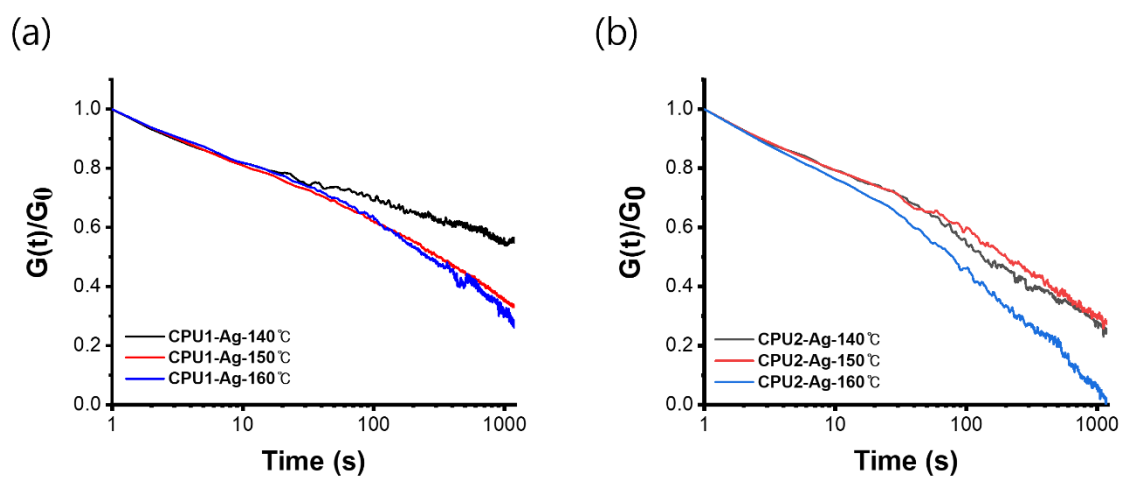

**Figure S6.** Stress relaxation analysis at 140 °C, 150 °C, 160 °C of CPU1-Ag (a) and CPU2-Ag (b).



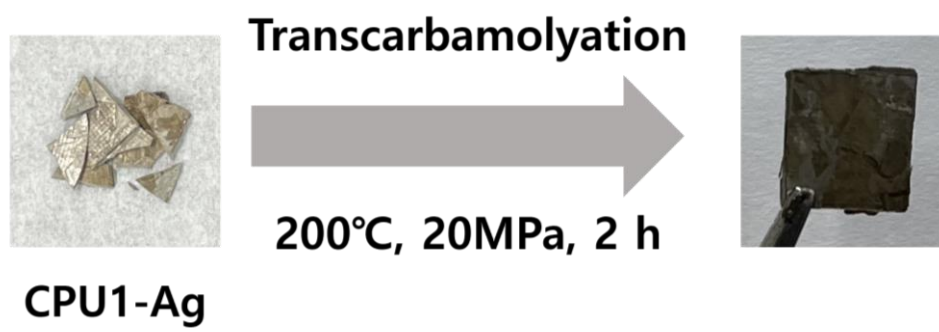

**Figure S7.** Malleability test of CPU1-Ag

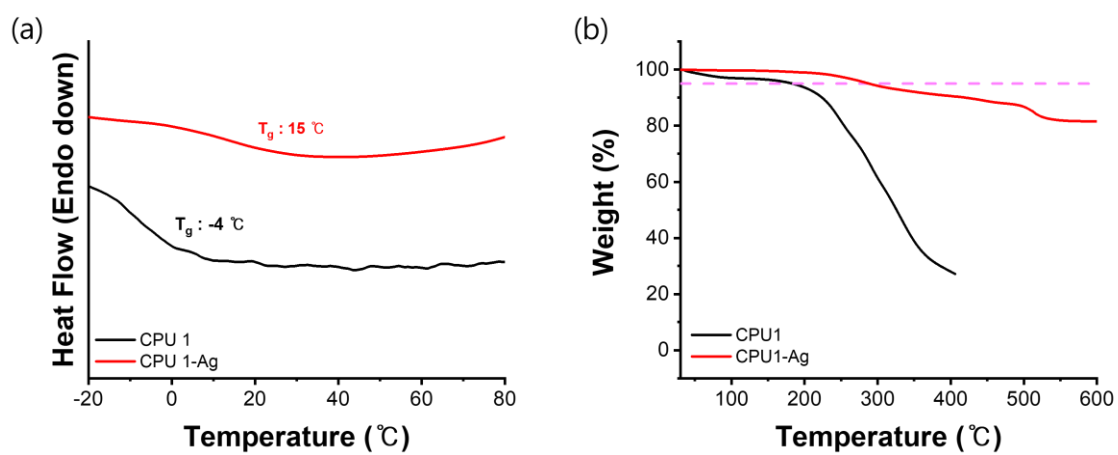

**Figure S8.** Comparisons of DSC (a) and TGA curves (b) of CPU1 and CPU1-Ag





(a)

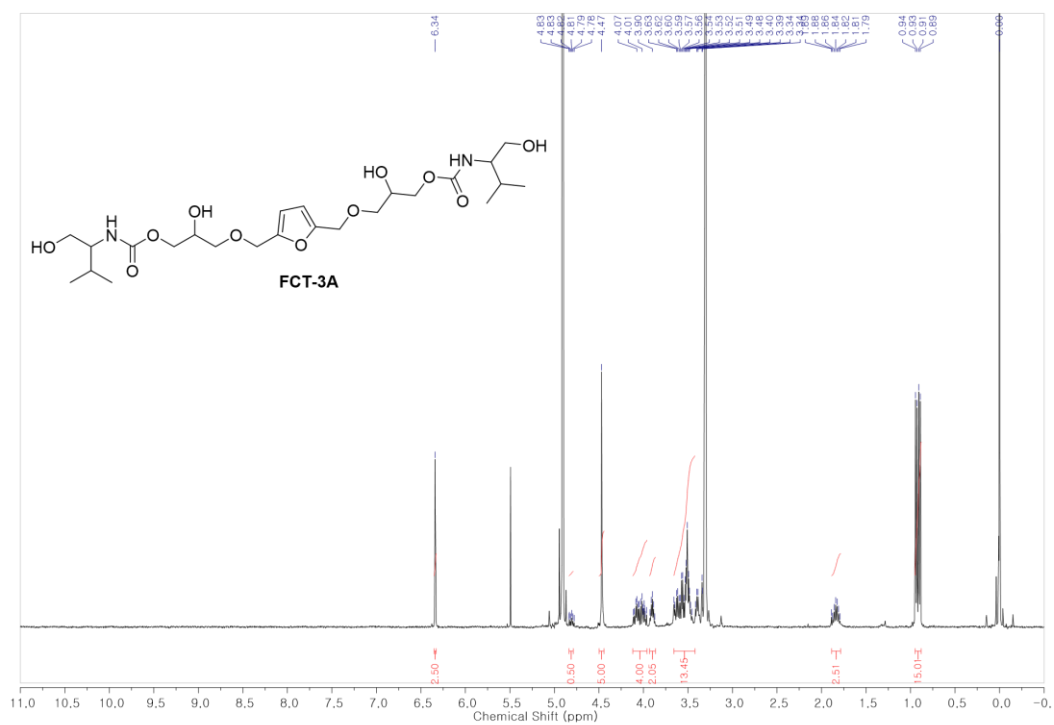

(b)

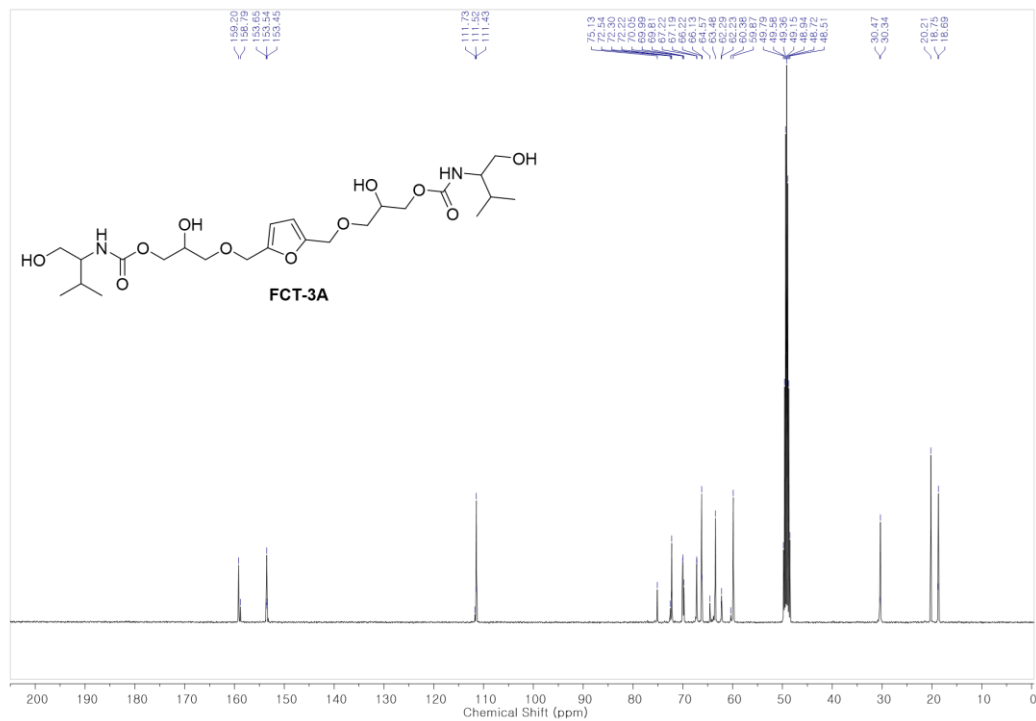

**Figure S11.**  $^1\text{H}$  (300 MHz,  $\text{CD}_3\text{OD}$ ) (a) and  $^{13}\text{C}$  NMR spectra (85 MHz,  $\text{CD}_3\text{OD}$ ) (b) of FCT-3.
